# Supplementary material for: On-chip anticancer drug test of regular tumor spheroids formed in microwells by a distributive microchannel network
Source: Royal Society of Chemistry journal article supplement (doi:10.1039/c2lc40570a), 2012-01-01
Supplement: c2lc40570a.pdf [file c2lc40570a.pdf]

## Supplementary information

### On-chip anticancer drug test of regular tumor spheroids formed in microwells by distributive microchannel network

5

Choong Kim<sup>a,b</sup>, Jae Hoon Bang<sup>a</sup>, Young Eun Kim<sup>a</sup>, and Ji Yoon Kang<sup>a\*</sup>

<sup>a</sup>Center for BioMicrosystem, Korea Institute of Science and Technology, Korea

<sup>b</sup>Department of Biological Engineering, Massachusetts Institute of Technology, USA

10

15

## Supplementary Figure

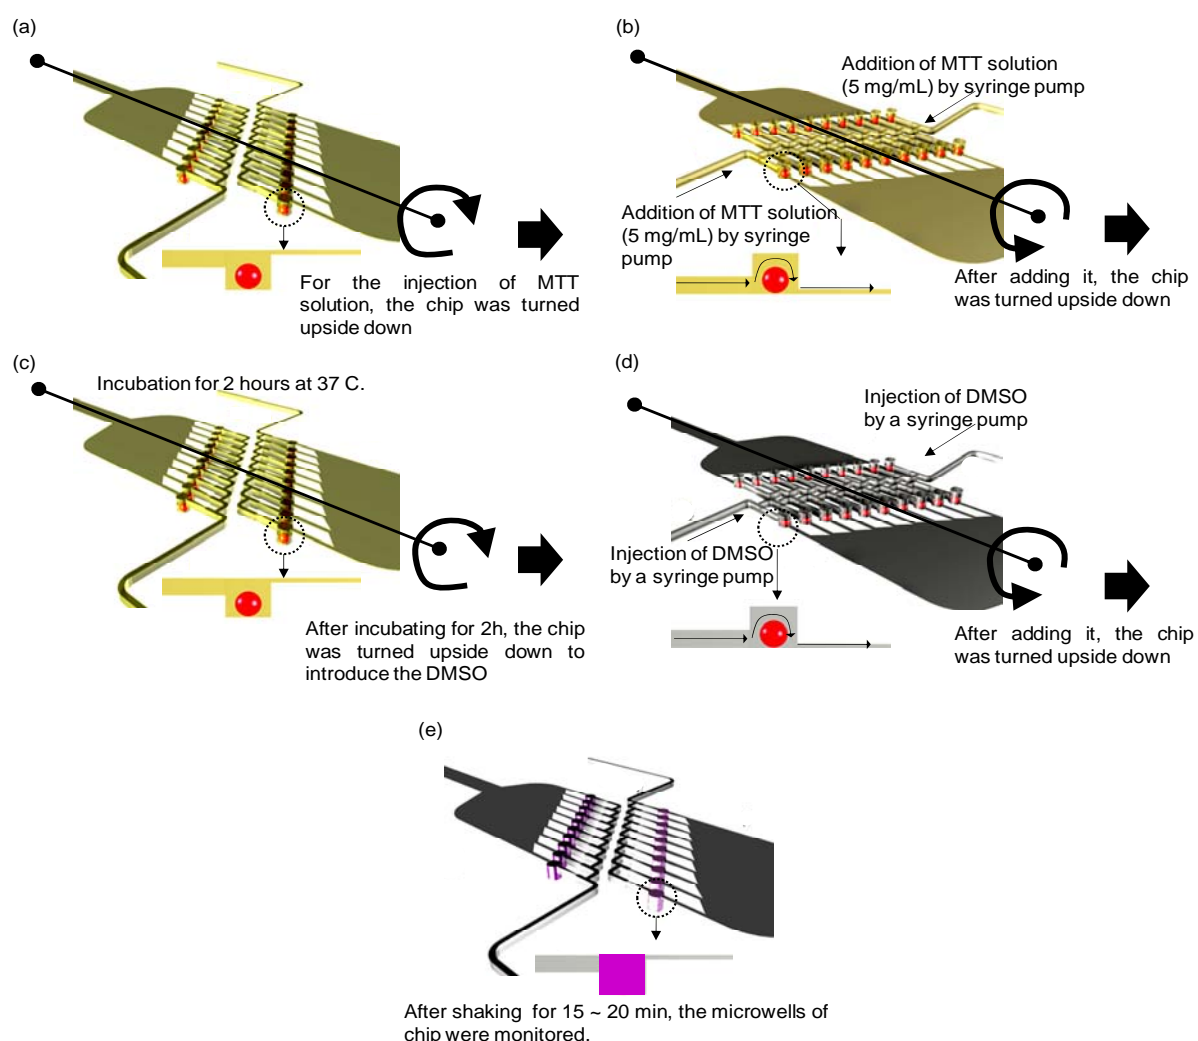

**Figure S1. MTT assay in the chip**

5 Cell viability was assessed by the MTT assays after anticancer drug treatment. (a) The chip was turned upside down to efficiently remove the media and replace with the MTT solution (5 mg/mL; Sigma). (b) The MTT solution was added through microfluidic channel by the syringe pump. (c) The chip was incubated for 2 hours at 37 C, and after incubating for 2 hours, the chip was turned upside down again. (d) The MTT solution was replaced with DMSO to  
10 dissolve the MTT tetrazolium dye. (e) After shaking for 15 ~ 20 min, color intensity of the images of microwell was quantified by MATLAB.
